# Supplementary material for: On the stability of microwave-fabricated SERS substrates – chemical and morphological considerations
Source: publisher site journal article supplement (doi:10.3762/bjnano.12.44), 2021-06-11
Supplement: Additional file 1 [file 2190-4286-12-44-S1.pdf]

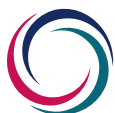

## Supporting Information

for

### **On the stability of microwave-fabricated SERS substrates – chemical and morphological considerations**

Limin Wang, Aisha Adebola Womiloju, Christiane Höppener, Ulrich S. Schubert  
and Stephanie Hoepfner

*Beilstein J. Nanotechnol.* **2021**, *12*, 541–551. [doi:10.3762/bjnano.12.44](https://doi.org/10.3762/bjnano.12.44)

## Additional figures and tables

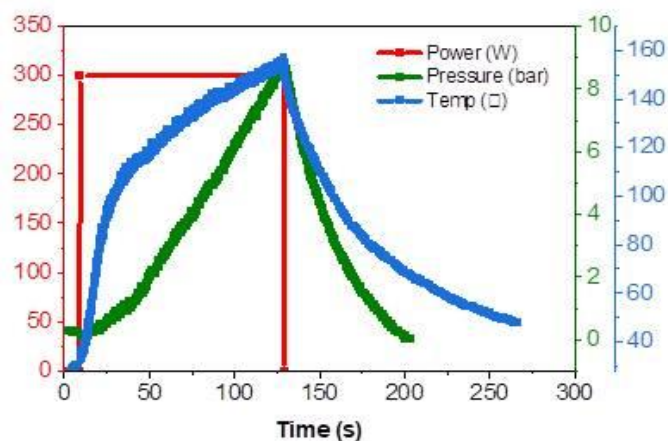

**Figure S1:** Representative diagram depicting the power, pressure, and temperature measured during the microwave-assisted coating of the glass substrate.

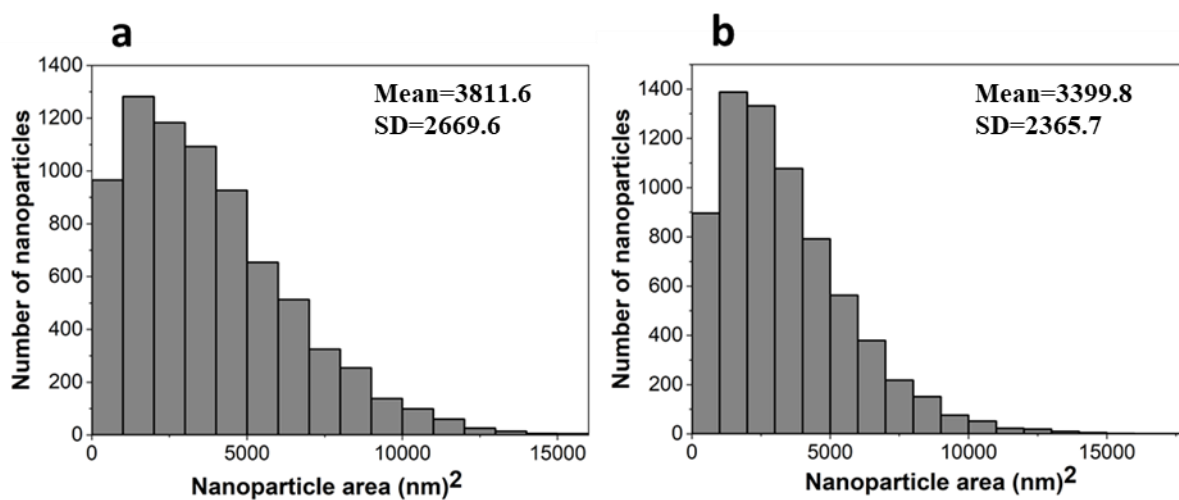

**Figure S2:** Histograms of SERS substrates from different batches after their preparation: (a) batch 1 and (b) batch 2.

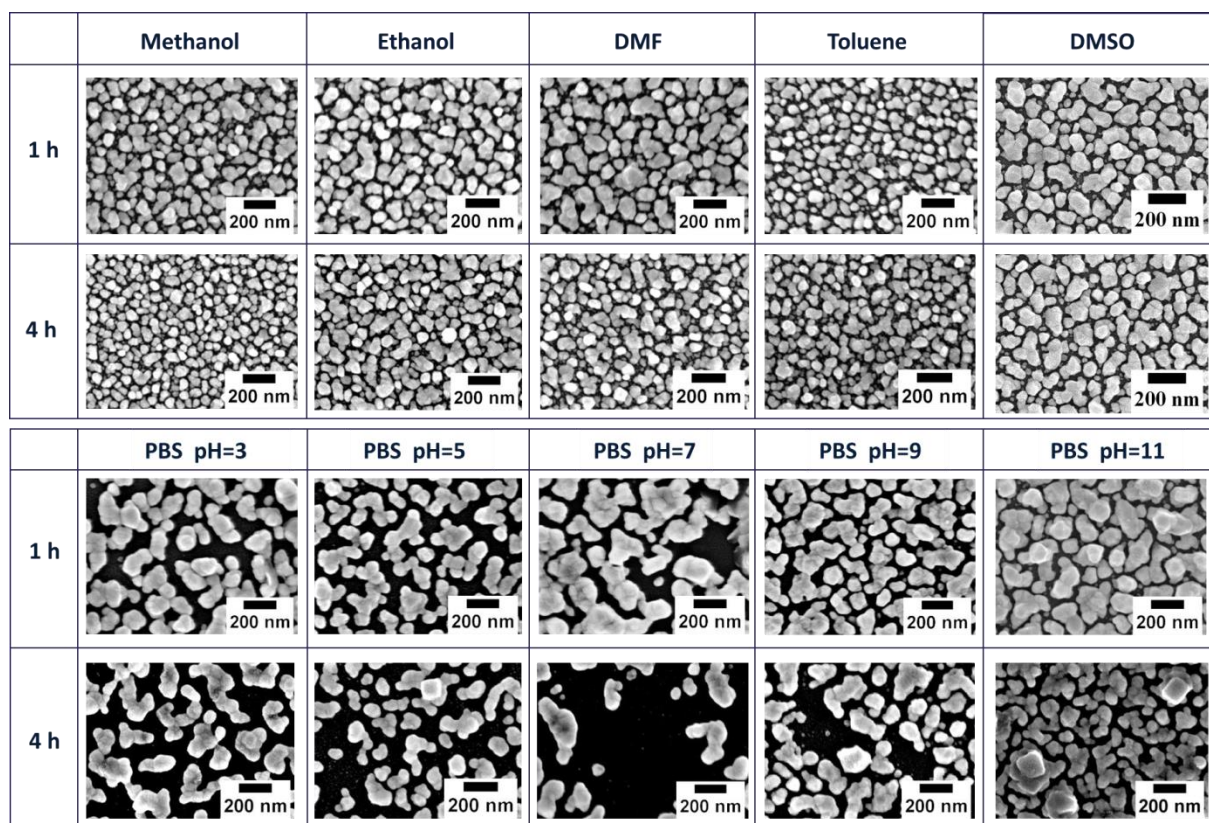

**Figure S3:** SEM images of the SERS substrates immersed into different organic solvents and PBS solutions for 1 and 4 h, respectively.

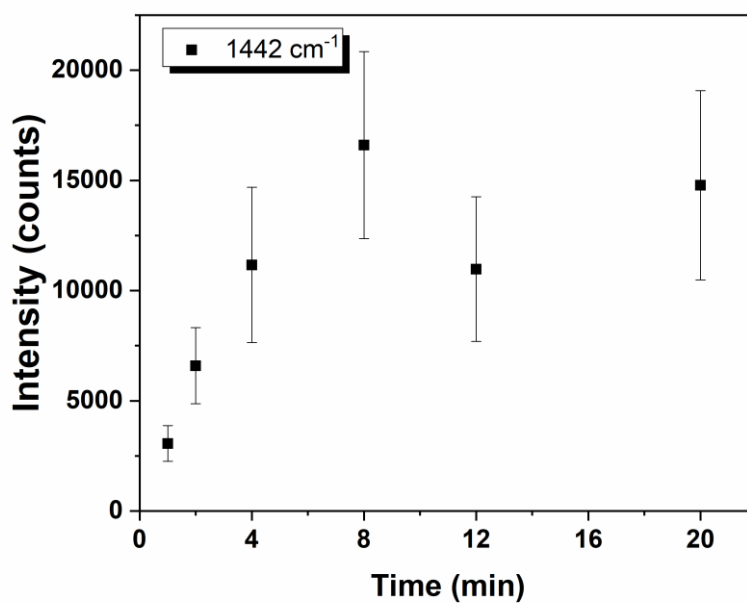

**Figure S4:** Raman intensities found for the marker peak at  $1442\text{ cm}^{-1}$  of a monolayer prepared from  $10^{-4}\text{ M}$  4-ATP. After eight minutes the peak intensity reaches a plateau, indicating the formation of a complete monolayer on the SERS substrates.

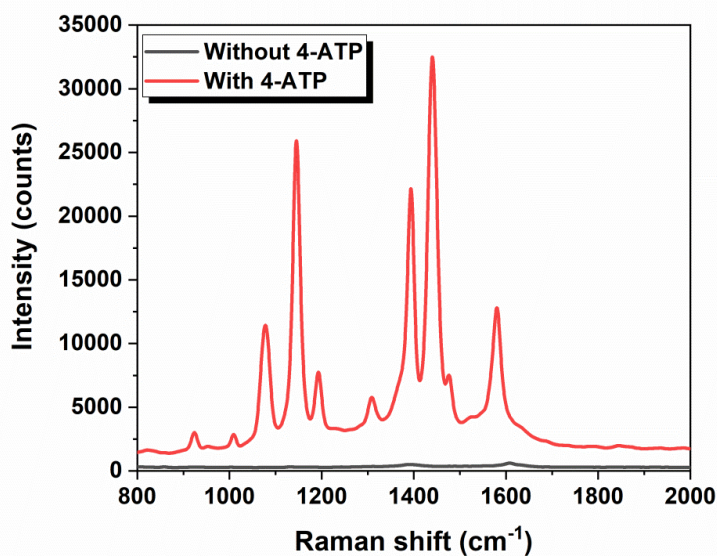

**Figure S5:** Reference Raman spectra of a 4-ATP-coated, non-treated, clean SERS substrate (red) and the Raman spectrum of the SERS substrate only (black). The corresponding peak assignment is provided in Table S1.

**Table S1:** Peak assignment for the SERS spectrum shown in Figure S5 [1,2]. A dimerization process takes place and leads to the transformation of 4-ATP into 4,4'-dimercaptoazobenzene (DMAB) as seen in the appearance of the  $b_2$  modes or  $a_g$ , respectively [1].

| SERS band frequency/cm <sup>-1</sup> | Assignment (4-APT/DMAB)                               |
|--------------------------------------|-------------------------------------------------------|
| 1580                                 | $\nu(\text{CC})$ , $b_2/a_g$ mode                     |
| 1440                                 | $\delta(\text{CH}) + \nu(\text{CC})$ , $b_2/a_g$ mode |
| 1394                                 | $\nu(\text{CC}) + \delta(\text{CH})$ , $b_2/a_g$ mode |
| 1145                                 | $\delta(\text{CH})$ , $a_1$ mode                      |
| 1078                                 | $\nu(\text{CS})$ , $a_1$ mode                         |

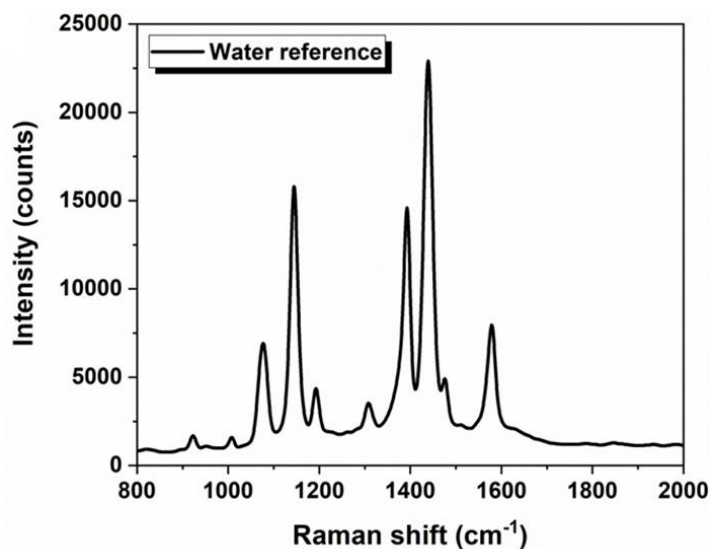

**Figure S6:** Reference Raman spectrum of a monolayer of 4-ATP self-assembled on a water-treated SERS substrate.

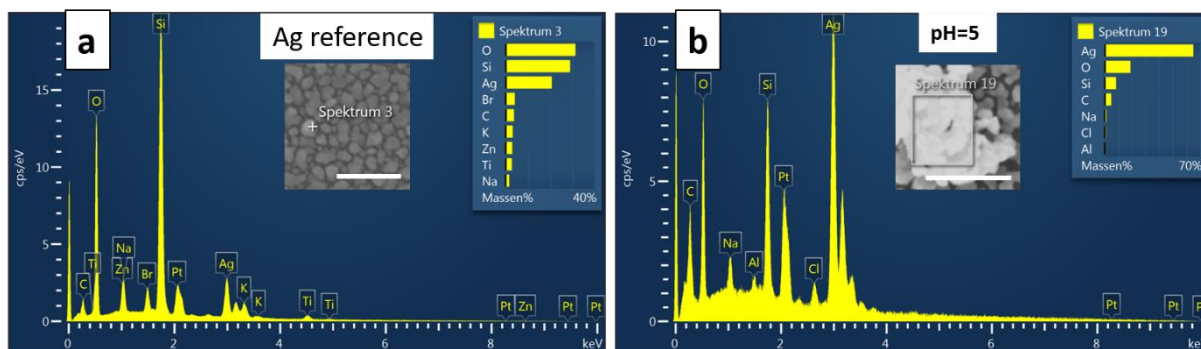

**Figure S7:** EDX elemental analysis of the SERS substrate without treatment (a) and treated with PBS buffer of pH 5 (b). The insets represent the SEM images. Scale bar: 500 nm. The elements O, Si, C, Na, and Al in (b) could be attributed to the glass substrate.

**Table S2:** Main components of different buffer solutions.

| Different buffer solutions | Ingredients                                                                      | Cations                          | Anions                                                                                            |
|----------------------------|----------------------------------------------------------------------------------|----------------------------------|---------------------------------------------------------------------------------------------------|
| <b>PBS pH 3</b>            | NaCl, KCl,<br>NaH <sub>2</sub> PO <sub>4</sub> , KH <sub>2</sub> PO <sub>4</sub> | Na <sup>+</sup> , K <sup>+</sup> | Cl <sup>-</sup> , H <sub>2</sub> PO <sub>4</sub> <sup>-</sup>                                     |
| <b>PBS pH 5</b>            | NaCl, KCl,<br>NaH <sub>2</sub> PO <sub>4</sub> , KH <sub>2</sub> PO <sub>4</sub> | Na <sup>+</sup> , K <sup>+</sup> | Cl <sup>-</sup> , H <sub>2</sub> PO <sub>4</sub> <sup>-</sup>                                     |
| <b>Acetate pH 5</b>        | CH <sub>3</sub> COONa,<br>CH <sub>3</sub> COOH                                   | Na <sup>+</sup>                  | CH <sub>3</sub> COO <sup>-</sup>                                                                  |
| <b>PBS pH 7</b>            | NaCl, KCl,<br>Na <sub>2</sub> HPO <sub>4</sub> , KH <sub>2</sub> PO <sub>4</sub> | Na <sup>+</sup> , K <sup>+</sup> | Cl <sup>-</sup> , HPO <sub>4</sub> <sup>2-</sup> ,<br>H <sub>2</sub> PO <sub>4</sub> <sup>-</sup> |
| <b>HBG pH 7</b>            | HEPES, glucose                                                                   |                                  |                                                                                                   |
| <b>TBE pH 8</b>            | Tris base, boric<br>acid, EDTA                                                   |                                  |                                                                                                   |
| <b>PBS pH 9</b>            | NaCl, KCl,<br>Na <sub>2</sub> HPO <sub>4</sub> , K <sub>2</sub> HPO <sub>4</sub> | Na <sup>+</sup> , K <sup>+</sup> | Cl <sup>-</sup> , HPO <sub>4</sub> <sup>2-</sup>                                                  |
| <b>Carbonate pH 10</b>     | NaHCO <sub>3</sub> , Na <sub>2</sub> CO <sub>3</sub>                             | Na <sup>+</sup>                  | HCO <sub>3</sub> <sup>-</sup> ,<br>CO <sub>3</sub> <sup>2-</sup>                                  |
| <b>PBS pH 11</b>           | NaCl, KCl,<br>Na <sub>2</sub> HPO <sub>4</sub> , K <sub>2</sub> HPO <sub>4</sub> | Na <sup>+</sup> , K <sup>+</sup> | Cl <sup>-</sup> , HPO <sub>4</sub> <sup>2-</sup>                                                  |

[1] Huang, Y.-F.; Wu, D.-Y.; Zhu, H.-P.; Zhao, L.-B.; Liu, G.-K.; Ren, B.; Tian, Z.-Q. *Phys. Chem. Chem. Phys.*, **2012**, *14*, 8485–8497.

[2] Hu, X.; Wang, T.; Wang, L.; Dong, S. *J. Phys. Chem. C* **2007**, *111*, 6962–6969.
